# Supplementary material
Source: PubMed Central journal article supplement (PMC4794664)
Supplement: JVI.02988-15_zjv999091498so1.pdf [file JVI.02988-15_zjv999091498so1.pdf]

**Supplementary Table S1.** Strains/isolates and NCBI accession numbers of analyzed MERS-CoV and lineage C Betacoronaviruses.

| Strain/isolate name                                          |   | Accession ID |
|--------------------------------------------------------------|---|--------------|
| NeoCoV                                                       | * | KC869678     |
| BtVs-BetaCoV/SC2013                                          | * | KJ473821     |
| Pi-BatCoV HKU5                                               | * | NC_009020    |
| BtCoV/133/2005                                               | * | NC_008315    |
| Ty-BatCoV HKU4                                               | * | NC_009019    |
| EriCoV/2012-216                                              | * | KC545386     |
| EriCoV/2012-174                                              | * | KC545383     |
| Human betaCoV 2c EMC/2012                                    | * | JX869059     |
| MERS CoV isolate Wadi-Ad-Dawasir_1_2013                      | * | KJ156881     |
| MERS CoV isolate FRA/UAE                                     | * | KF745068     |
| MERS CoV isolate Riyadh_1_2012                               | * | KF600612     |
| MERS CoV isolate Hafr-Al-Batin_1_2013                        | * | KF600628     |
| MERS CoV isolate Al-Hasa_17_2013                             | * | KF600647     |
| MERS CoV strain Hu/Oman_2285_2013                            |   | KT156560     |
| MERS CoV strain Hu/Oman_2874_2013                            |   | KT156561     |
| MERS CoV isolate MERS-CoV/KOR/KNIH/002_05_2015               |   | KT029139     |
| MERS CoV strain Hu/Riyadh_KSA_2959_2015                      |   | KT026453     |
| MERS CoV strain Hu/Riyadh_KSA_4050_2015                      |   | KT026454     |
| MERS CoV strain ChinaGD01                                    |   | KT006149     |
| MERS CoV strain Hu/Riyadh-KSA-2345/2015                      |   | KR011263     |
| MERS CoV strain Hu/Riyadh-KSA-2343/2015                      |   | KR011264     |
| MERS CoV strain Hu/Riyadh-KSA-2466/2015                      |   | KR011265     |
| MERS CoV strain Hu/Riyadh-KSA-2049/2015                      |   | KR011266     |
| MERS CoV isolate Hu-France (UAE) - FRA1_1627-2013_BAL_Sanger |   | KJ361500     |
| MERS CoV isolate Hu-France - FRA2_130569-2013_InSpu_Sanger   |   | KJ361502     |
| MERS CoV isolate Camel/UAE/D1164.9/2014                      |   | KP719927     |
| MERS CoV isolate Camel/UAE/D1164.10/2014                     |   | KP719928     |
| MERS CoV isolate Camel/UAE/D1164.11/2014                     |   | KP719929     |
| MERS CoV isolate Camel/UAE/D1164.14/2014                     |   | KP719930     |
| MERS CoV isolate Camel/UAE/D1339/2014                        |   | KP719931     |
| MERS CoV isolate Camel/UAE/D1243.12/2014                     |   | KP719932     |
| MERS CoV isolate Camel/UAE/D1209/2014                        |   | KP719933     |
| MERS CoV isolate England/4/2013                              |   | KM210277     |
| MERS CoV isolate England/3/2013                              |   | KM210278     |
| MERS CoV isolate Florida/USA-2_Saudi Arabia_2014             |   | KP223131     |
| MERS CoV strain Abu Dhabi_UAE_8_2014                         |   | KP209306     |
| MERS CoV strain Abu Dhabi_UAE_18_2014                        |   | KP209307     |
| MERS CoV strain Abu Dhabi_UAE_16_2014                        |   | KP209308     |
| MERS CoV strain Abu Dhabi_UAE_30_2014                        |   | KP209309     |
| MERS CoV strain Abu Dhabi/Gayathi_UAE_2_2014                 |   | KP209310     |
| MERS CoV strain Abu Dhabi_UAE_33_2014                        |   | KP209311     |
| MERS CoV strain Abu Dhabi_UAE_9_2013                         |   | KP209312     |
| MERS CoV strain Abu Dhabi_UAE_26_2014                        |   | KP209313     |
| MERS CoV isolate Jeddah_C7149/KSA/2014-04-05                 |   | KM027255     |
| MERS CoV isolate Jeddah_C7569/KSA/2014-04-03                 |   | KM027256     |
| MERS CoV isolate Jeddah_C7770/KSA/2014-04-07                 |   | KM027257     |
| MERS CoV isolate Jeddah_C8826/KSA/2014-04-12                 |   | KM027258     |
| MERS CoV isolate Jeddah_C9055/KSA/2014-04-14                 |   | KM027259     |

|                                                     |          |
|-----------------------------------------------------|----------|
| MERS CoV isolate Jeddah_C10306/KSA/2014-04-20       | KM027260 |
| MERS CoV isolate Makkah_C9355/KSA/Makkah/2014-04-15 | KM027261 |
| MERS CoV isolate Riyadh_2014KSA_683/KSA/2014        | KM027262 |
| MERS CoV isolate England/2/2013                     | KM015348 |
| MERS CoV strain Indiana/USA-1_Saudi Arabia_2014     | KJ813439 |
| MERS CoV isolate Camel/Qatar_2_2014                 | KJ650098 |
| MERS CoV isolate KSA-CAMEL-505                      | KJ713295 |
| MERS CoV isolate KSA-CAMEL-378                      | KJ713296 |
| MERS CoV isolate KSA-CAMEL-503                      | KJ713297 |
| MERS CoV isolate KSA-CAMEL-363                      | KJ713298 |
| MERS CoV isolate KSA-CAMEL-376                      | KJ713299 |
| MERS CoV isolate MERS-CoV-Jeddah-Camel-1            | KF917527 |
| MERS CoV isolate MERS-CoV-Jeddah-human-1            | KF958702 |
| MERS CoV isolate KFU-HKU 13                         | KJ650295 |
| MERS CoV isolate KFU-HKU 19Dam                      | KJ650296 |
| MERS CoV isolate KFU-HKU 1                          | KJ650297 |
| MERS CoV isolate Jeddah_1_2013                      | KJ556336 |
| MERS CoV isolate NRCE-HKU205                        | KJ477102 |
| MERS CoV isolate Al-Hasa_25_2013                    | KJ156866 |
| MERS CoV isolate Riyadh_9_2013                      | KJ156869 |
| MERS CoV isolate Hafr-Al-Batin_6_2013               | KJ156874 |
| MERS CoV isolate Hafr-Al-Batin_2_2013               | KJ156910 |
| MERS CoV isolate Riyadh_14_2013                     | KJ156934 |
| MERS CoV isolate Riyadh_5_2013                      | KJ156944 |
| MERS CoV isolate Taif_1_2013                        | KJ156949 |
| MERS CoV isolate Riyadh_4_2013                      | KJ156952 |
| MERS CoV isolate Qatar3                             | KF961221 |
| MERS CoV isolate Qatar4                             | KF961222 |
| MERS CoV isolate Riyadh_3_2013                      | KF600613 |
| MERS CoV isolate Bisha_1_2012                       | KF600620 |
| MERS CoV isolate Al-Hasa_12_2013                    | KF600627 |
| MERS CoV isolate Buraidah_1_2013                    | KF600630 |
| MERS CoV isolate Al-Hasa_19_2013                    | KF600632 |
| MERS CoV isolate Al-Hasa_21_2013                    | KF600634 |
| MERS CoV isolate Al-Hasa_16_2013                    | KF600644 |
| MERS CoV isolate Al-Hasa_15_2013                    | KF600645 |
| MERS CoV isolate Al-Hasa_18_2013                    | KF600651 |
| MERS CoV isolate Riyadh_2_2012                      | KF600652 |
| MERS CoV isolate Al-Hasa_4_2013                     | KF186564 |
| MERS CoV isolate Al-Hasa_3_2013                     | KF186565 |
| MERS CoV isolate Al-Hasa_2_2013                     | KF186566 |
| MERS CoV isolate Al-Hasa_1_2013                     | KF186567 |
| MERS CoV strain Munich                              | KF192507 |
| Human betaCoV 2c Jordan-N3/2012                     | KC776174 |
| Human betaCoV 2c England-Qatar/2012                 | KC667074 |
| BetaCoV England 1                                   | KC164505 |

---

\* strain used in the branch-site analysis.

**Supplementary Table S2.** List of positively selected sites detected in branch-site tests.

| nsp  | Relative Position <sup>a</sup> | Absolute Position <sup>b</sup> | Selected Branch |
|------|--------------------------------|--------------------------------|-----------------|
| nsp1 | S110                           | S110                           | Branch 16       |
| nsp2 | C190                           | C383                           | Branch 23       |
| nsp2 | D225                           | D418                           | Branch 23       |
| nsp2 | V257                           | V450                           | Branch 23       |
| nsp2 | L321                           | L514                           | Branch 23       |
| nsp2 | N388                           | N581                           | Branch 16       |
| nsp2 | A490                           | A693                           | Branch 23       |
| nsp2 | V568                           | V761                           | Branch 23       |
| nsp3 | R42                            | R895                           | Branch 23       |
| nsp3 | S49                            | S902                           | Branch 16       |
| nsp3 | C91                            | C944                           | Branch 16       |
| nsp3 | K365                           | K1218                          | Branch 23       |
| nsp3 | M370                           | M1223                          | Branch 23       |
| nsp3 | L406                           | L1259                          | Branch 23       |
| nsp3 | V421                           | V1274                          | Branch 23       |
| nsp3 | V448                           | V1301                          | Branch 23       |
| nsp3 | C482                           | C1335                          | Branch 23       |
| nsp3 | I503                           | I1356                          | Branch 23       |
| nsp3 | M517                           | M1370                          | Branch 23       |
| nsp3 | N536                           | N1389                          | Branch 23       |
| nsp3 | M723                           | M1576                          | Branch 23       |
| nsp3 | R730                           | R1583                          | Branch 23       |
| nsp3 | R812                           | R1665                          | Branch 23       |
| nsp3 | Q830                           | Q1683                          | Branch 16       |
| nsp3 | S947                           | S1800                          | Branch 16       |
| nsp3 | Q1009                          | Q1862                          | Branch 23       |

|      |       |       |           |
|------|-------|-------|-----------|
| nsp3 | Y1035 | Y1888 | Branch 16 |
| nsp3 | T1080 | T1933 | Branch 16 |
| nsp3 | P1107 | P1960 | Branch 23 |
| nsp3 | Y1160 | Y2013 | Branch 23 |
| nsp3 | R1228 | R2081 | Branch 23 |
| nsp3 | G1295 | G2148 | Branch 23 |
| nsp3 | K1361 | K2214 | Branch 23 |
| nsp3 | A1386 | A2239 | Branch 16 |
| nsp3 | W1454 | W2307 | Branch 23 |
| nsp3 | G1459 | G2312 | Branch 23 |
| nsp3 | Q1467 | Q2320 | Branch 23 |
| nsp3 | S1666 | S2519 | Branch 17 |
| nsp3 | S1797 | S2650 | Branch 23 |
| nsp3 | C1815 | C2668 | Branch 16 |
| nsp3 | A1845 | A2698 | Branch 23 |
| nsp3 | N1871 | N2724 | Branch 23 |
| nsp4 | N6    | N2746 | Branch 23 |
| nsp4 | G15   | G2755 | Branch 23 |
| nsp4 | G202  | G2942 | Branch 16 |
| nsp4 | C345  | C3085 | Branch 16 |
| nsp4 | G453  | G3193 | Branch 23 |
| nsp4 | K480  | K3220 | Branch 23 |
| nsp5 | H8    | H3255 | Branch 23 |
| nsp5 | Q86   | Q3333 | Branch 23 |
| nsp5 | V132  | V3379 | Branch 23 |
| nsp5 | V256  | V3503 | Branch 23 |
| nsp6 | K5    | K3558 | Branch 23 |
| nsp8 | N149  | N4077 | Branch 16 |

|       |      |       |           |
|-------|------|-------|-----------|
| nsp10 | S61  | S4298 | Branch 23 |
| nsp12 | T272 | T4649 | Branch 16 |
| nsp12 | N387 | N4764 | Branch 23 |
| nsp12 | G779 | G5156 | Branch 23 |
| nsp13 | A505 | A5815 | Branch 23 |
| nsp14 | T228 | T6136 | Branch 23 |
| nsp14 | S284 | S6192 | Branch 23 |
| nsp14 | S371 | S6279 | Branch 23 |
| nsp15 | S305 | S6737 | Branch 23 |
| nsp16 | N138 | N6913 | Branch 23 |
| nsp16 | T151 | T6926 | Branch 23 |
| nsp16 | T214 | T6989 | Branch 23 |
| nsp16 | K249 | K7024 | Branch 23 |

<sup>a</sup> The numbering refers to the position of the site relative to the specific nsp.

<sup>b</sup> The numbering refers to the position of the site in ORF1ab (NCBI ID: JX869059).

**Supplementary Table S3.** List of coevolving sites.

| Nsp   | Site <sup>a</sup> | Nsp   | Site <sup>a</sup> |
|-------|-------------------|-------|-------------------|
| nsp1  | 54                | nsp3  | 1425              |
| nsp3  | 75                | nsp3  | 607               |
| nsp3  | 94                | nsp3  | 1440              |
| nsp3  | 405               | nsp3  | 1680              |
| nsp3  | 546               | nsp3  | 1783              |
| nsp3  | 558               | nsp3  | 1153              |
| nsp12 | 200               | nsp14 | 322               |

<sup>a</sup> The numbering refers to the position of the site relative to the specific nsp.
